# Supplementary material for: Inhibition of oxidative stress-induced epithelial-mesenchymal transition in retinal pigment epithelial cells of age-related macular degeneration model by suppressing ERK activation
Source: PubMed Central journal article supplement — J Adv Res. 2023 Jun 15;60:141–57. doi: 10.1016/j.jare.2023.06.004 (PMC11156608; doi:10.1016/j.jare.2023.06.004), 2023-06-15

**Fig. 1A (Triplicate)**

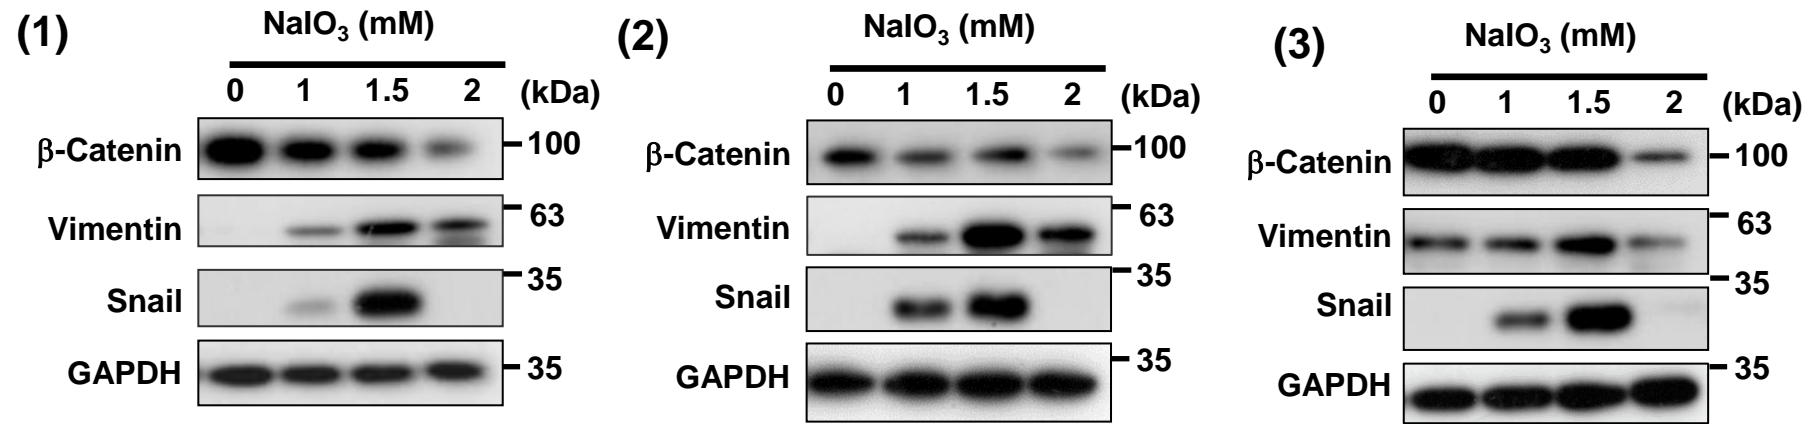

**Fig. 2F (Triplicate)**

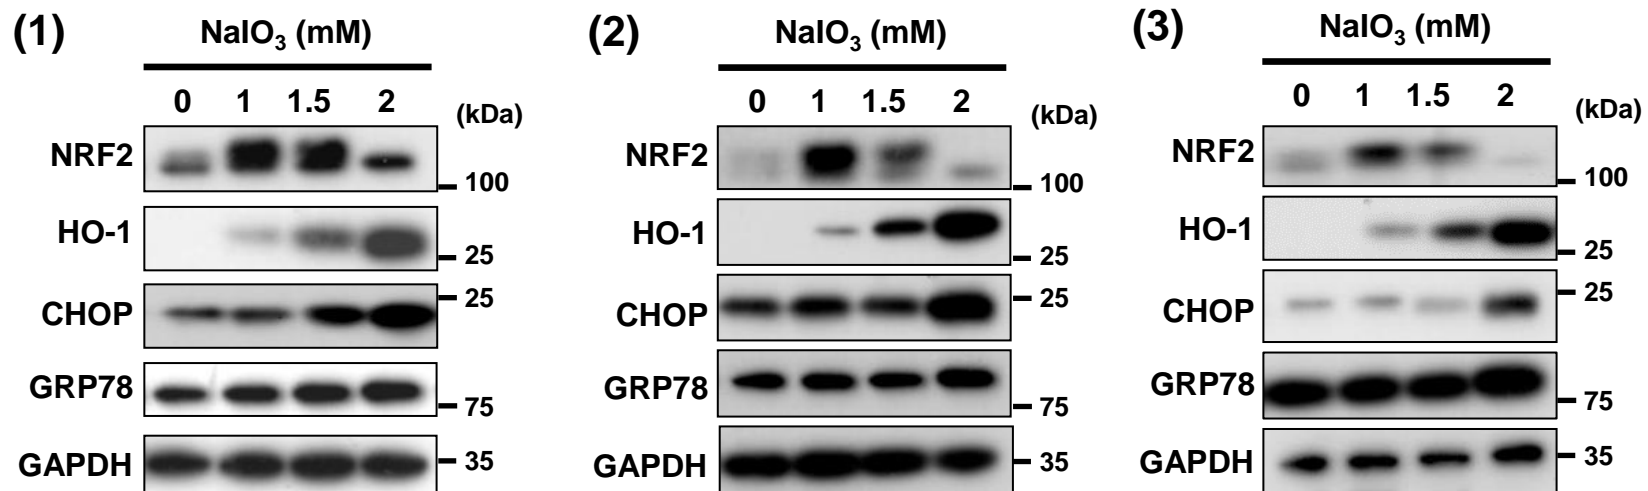

**Fig. 2H (Triplicate)**

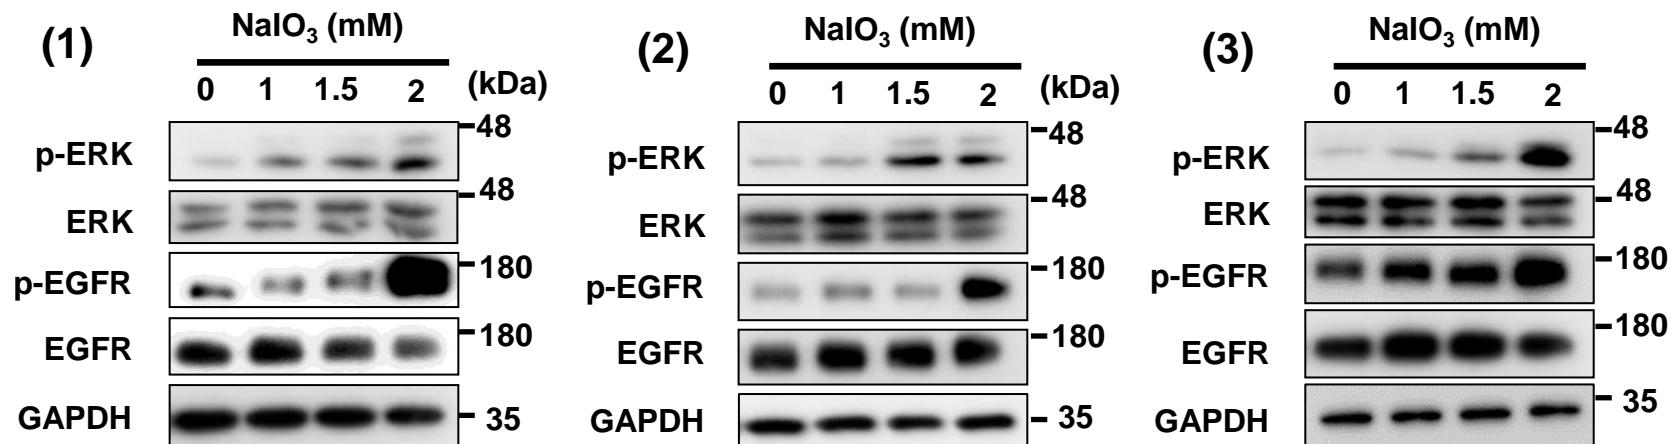

**Fig. 3A (Triplicate)**

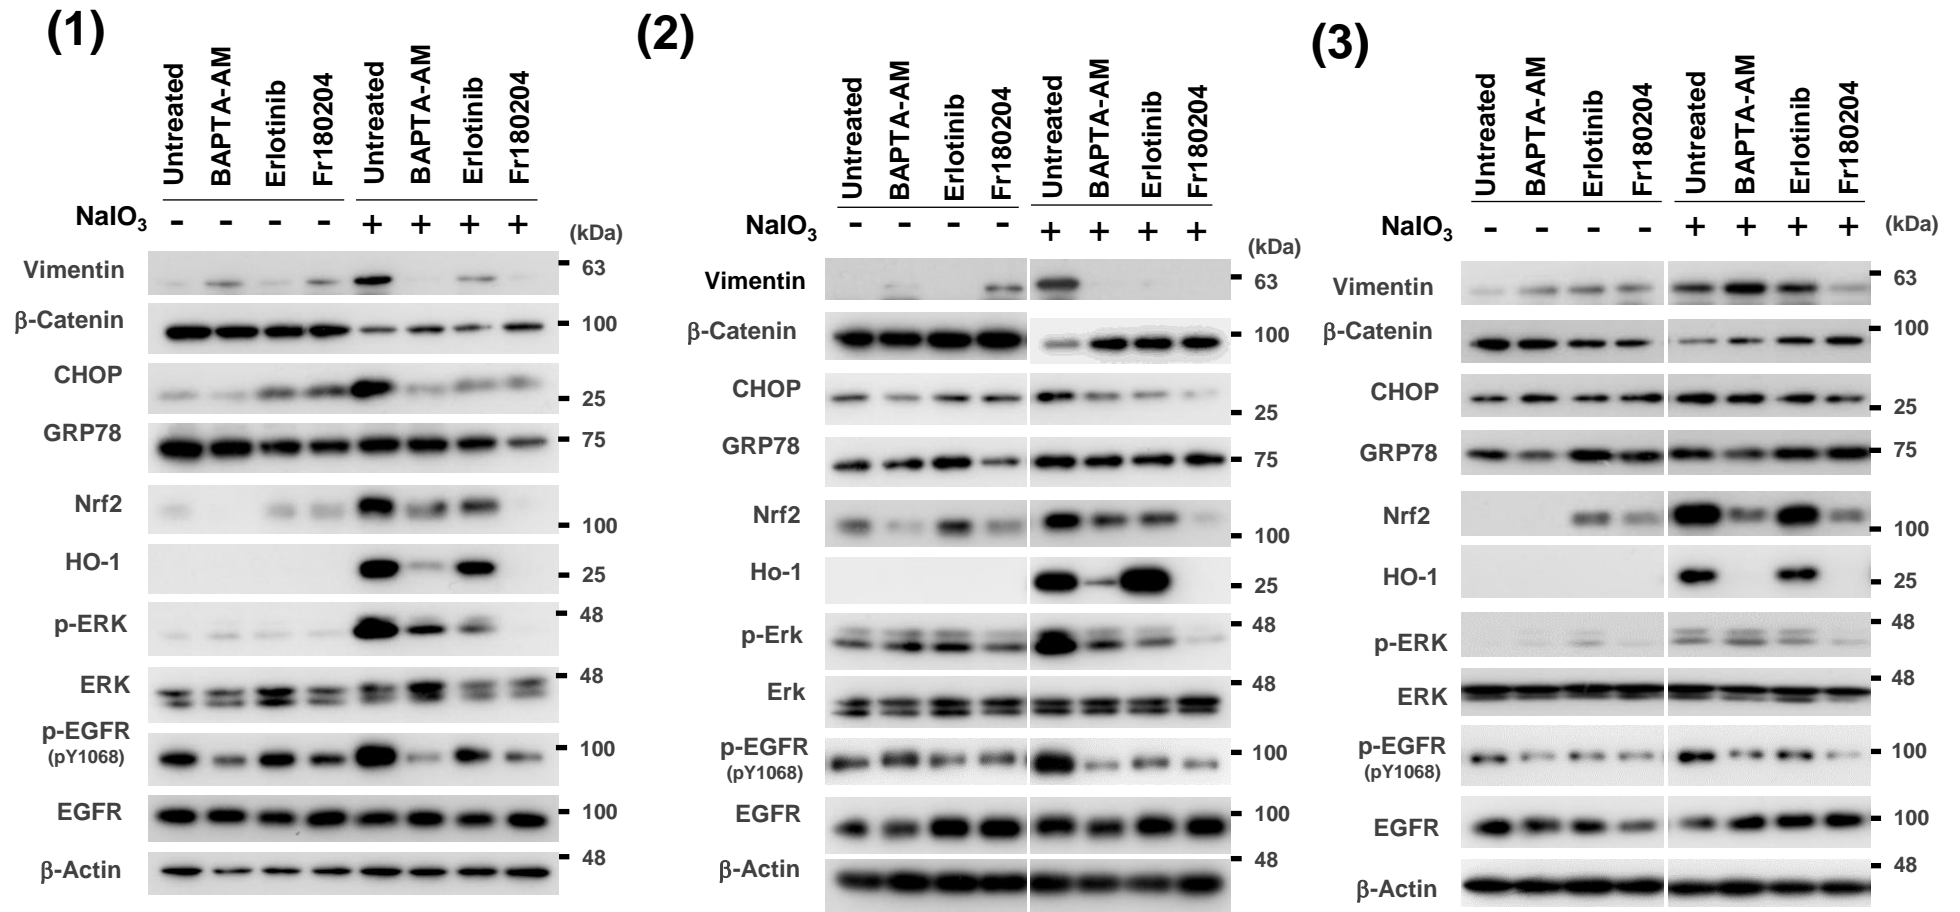

**Fig. 4F (Triplicate)**

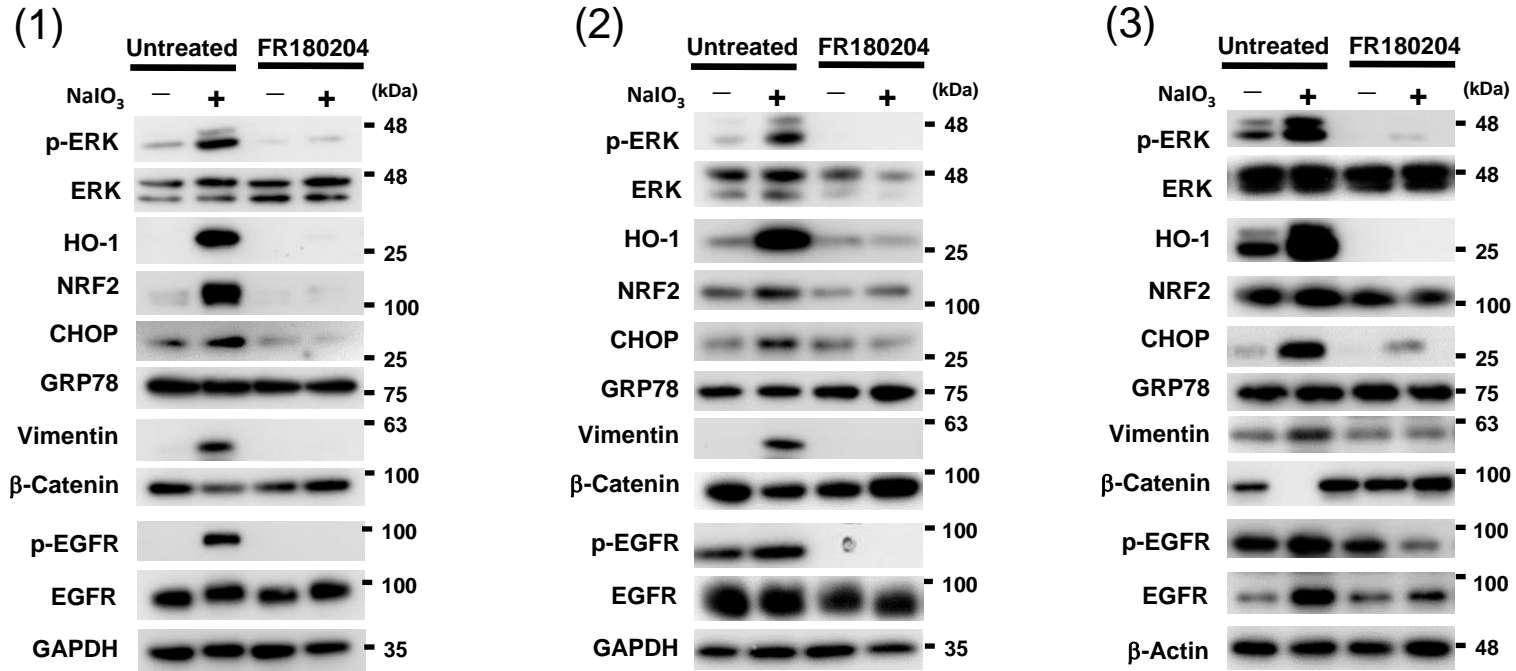

**Note:**

1. “Figure 4F (Triplicate) (3)” is from “Figure 5B (Triplicate) (3)”.
2. “Figure 4F” had been repeated for 5 times and shown in the triplicate results of Figure 4F and Figure 5B.

**Fig. 5A (Triplicate)**

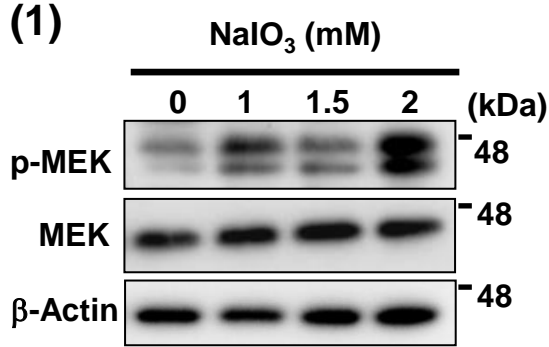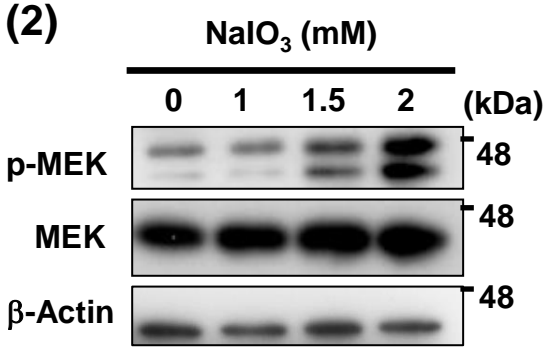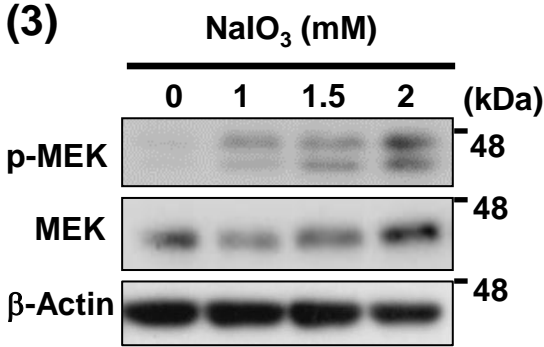

Supplement: mmc2.pdf [file mmc2.pdf]
